# Supplementary material
Source: PubMed Central journal article supplement (PMC3887459)
Supplement: Supp_Figure1.pdf [file Supp_Figure1.pdf]

## Supplementary Data

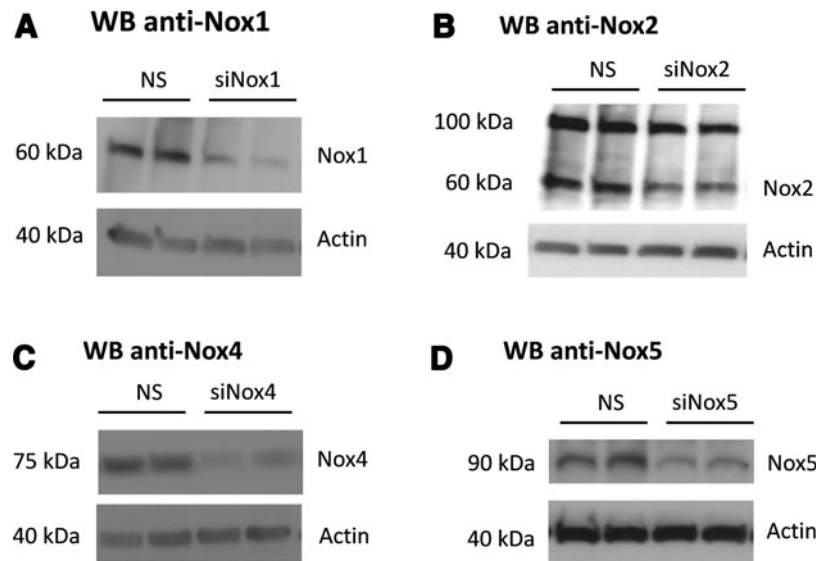

**SUPPLEMENTARY FIG. S1.** Western blot analysis of Nox depletion using Nox1 (A), Nox2 (B), Nox4 (C), and Nox5 (D) siRNA. HAEC were transfected with NS siRNA or specific siRNA for Nox isoforms using oligofectamine (Invitrogen). HAEC were harvested 3 days after siRNA transfection. HAEC, human aortic endothelial cells.
